# Supplementary material
Source: PubMed Central journal article supplement (PMC3936195)
Supplement: NIHMS554121-supplement-1.pdf [file NIHMS554121-supplement-1.pdf]

Figure S1

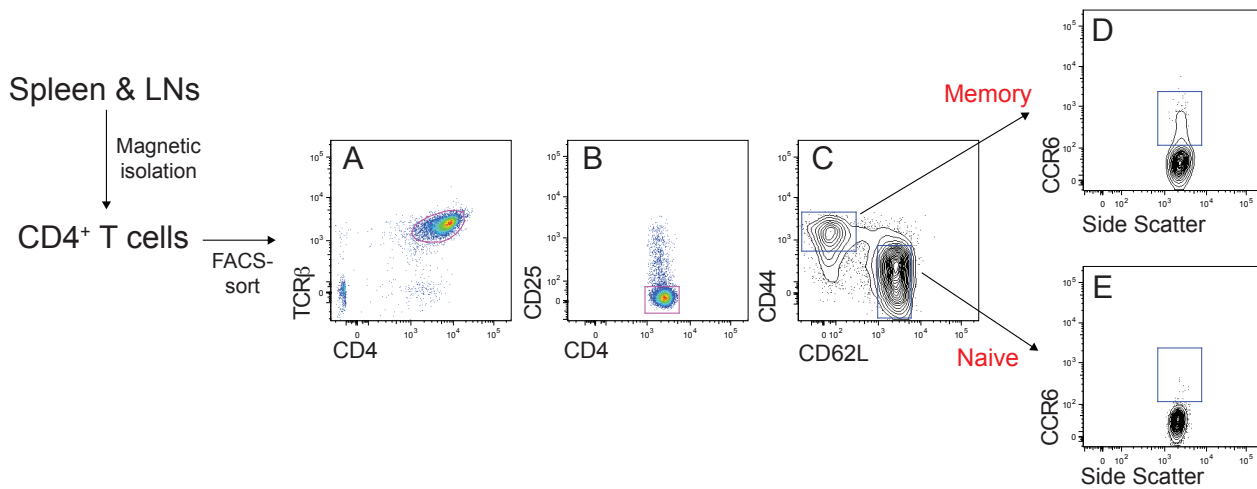

**Figure S1. Sorting of endogenous CD4<sup>+</sup> T cell subsets by FACS.** Total CD4<sup>+</sup> T cells magnetically isolated from pooled spleen/peripheral lymph node mononuclear cells of mice were FACS-sorted. Briefly, TCRβ<sup>+</sup>CD4<sup>+</sup> T cells were gated (**A**), followed by gating out CD25<sup>hi</sup> regulatory T cells (**B**). Naive (CD44<sup>lo</sup>CD62L<sup>hi</sup>) or memory (CD44<sup>hi</sup>CD62L<sup>lo</sup>) T cells were then gated as shown in (**C**), and both subsets were analyzed for/sorted on CCR6 expression (**D**, **E**).

Figure S2

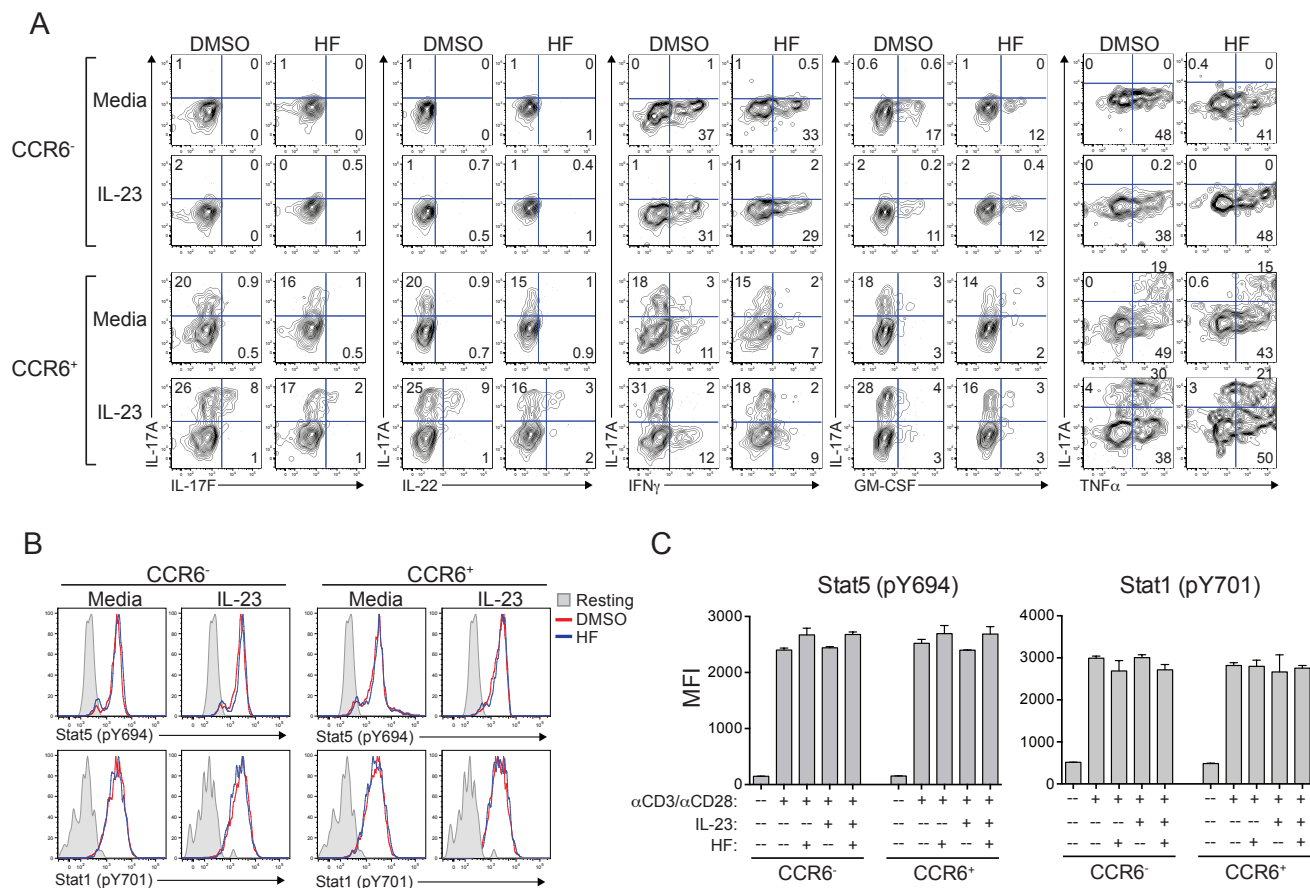

**Figure S2. HF selectively regulates IL-23-dependent cytokine expression in endogenous memory T cells.** (A) Cytokine expression in FACS-sorted and CD3/CD28-stimulated CCR6<sup>-</sup> or CCR6<sup>+</sup> memory T cells cultured for 48 hours +/- IL-23 in the presence of DMSO or HF (20 nM). Cells were washed and restimulated with PMA and ionomycin prior to intracellular staining. Data represent 5 independent experiments, each using cells pooled and sorted from 10-20 mice. TNF $\alpha$  data represent 3 experiments. (B) Endogenous CCR6<sup>-</sup> or CCR6<sup>+</sup> CD4<sup>+</sup>CD25<sup>-</sup>CD44<sup>hi</sup>CD62L<sup>lo</sup> effector/memory T cells were FACS-sorted, left unstimulated or stimulated with anti-CD3/anti-CD28, and stimulated cells were cultured for 48 hours +/- IL-23. These cultures were further treated with vehicle (DMSO) or 10 nM HF, and phosphorylation of Stat5 (Y694) and Stat1 (Y701) was determined by phospho-specific intracellular staining and FACS analysis. The overlaid histograms are representative of 3 independent experiments. (C) Combined analysis of Stat5 (*Left*) and Stat1 (*Right*) phosphorylation in endogenous CCR6<sup>-</sup> or CCR6<sup>+</sup> memory T cells determined as in (B). Data are presented as mean Stat5 or Stat1 mean fluorescence intensity (MFI)  $\pm$  SD from 3 experiments.

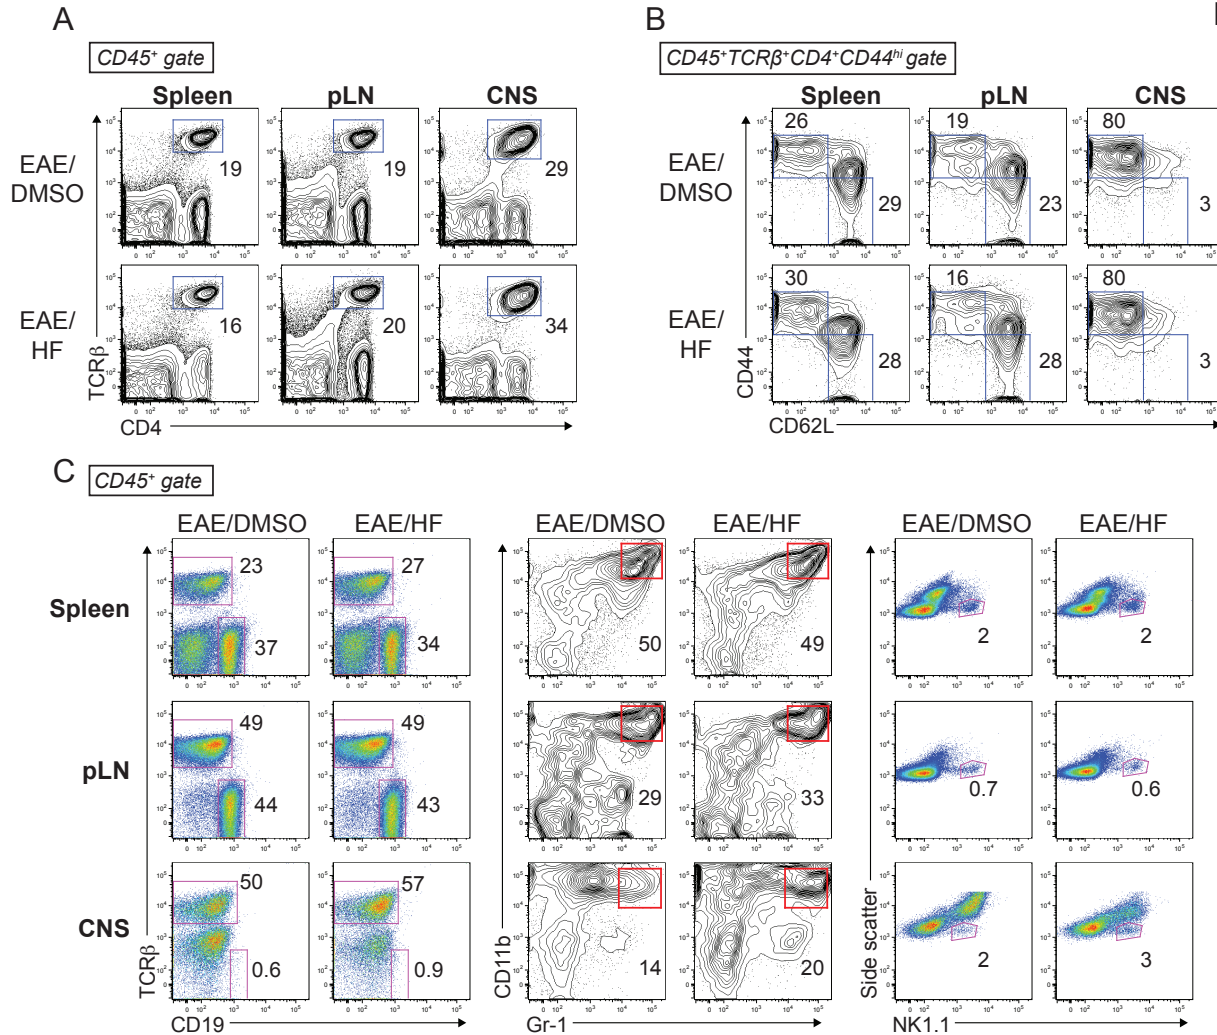

**Figure S3. Representative analyses of EAE mice dosed therapeutically with HF.** (A) Expression of TCR $\beta$  and CD4 within CD45<sup>+</sup> mononuclear cells from the spleen, peripheral lymph nodes (pLNs), or brain and spinal cord (CNS) of DMSO- or HF-treated mice with active EAE. (B) Expression of CD44 and CCR6 in CD45<sup>+</sup>TCR $\beta$ <sup>+</sup>CD4<sup>+</sup> T cells isolated from DMSO- or HF-treated mice (as in [A]). (C) Immunophenotypic analyses of CD45<sup>+</sup> mononuclear cells isolated from the spleen, draining lymph nodes, or CNS of EAE mice treated with DMSO or HF. All data represent analysis of 6-8 mice per group.

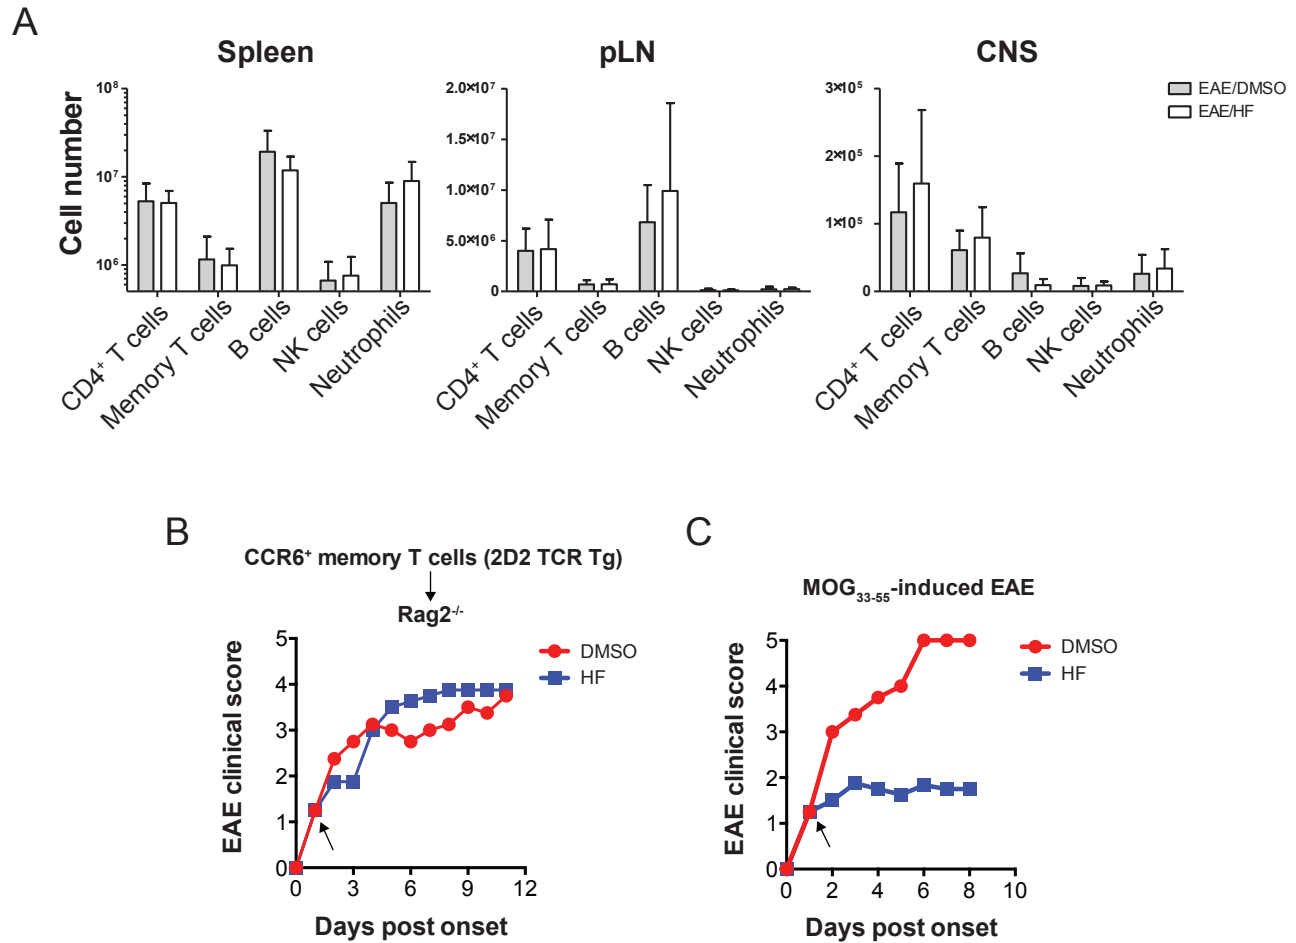

**Figure S4. Effects of therapeutic HF dosing in EAE.** (A) Mean mononuclear cell numbers  $\pm$  SD from 6-8 mice per group quantified by cell counting and FACS analysis (as in Figure S3C) of spleen (*Left*), peripheral lymph nodes (pLN – *Middle*), or brain and spinal cords (CNS – *Right*) of mice treated for 10 days with DMSO or HF following onset of EAE. No P values are significant ( $< .05$ ) by paired student's *t* test. Data incorporate 2 independent experiments analyzing 3-4 mice per treatment group. (B) Endogenous CCR6<sup>+</sup> effector/memory T cells were FACS-sorted from spleens and peripheral lymph nodes of 2D2 TCR transgenic mice. Purified cells were expanded *in vitro* for 5 days with anti-CD3/anti-CD28 beads + IL-2 and  $10^5$  cells were injected into Rag1<sup>-/-</sup> mice. Recipients were treated daily with DMSO or 0.3 mg/kg HF ( $n = 4$  per group) beginning at onset of clinical disease; symptoms were followed over 10 days. (C) The same batch of HF used in (B) was used to treat wild-type C57BL/6 mice immunized with MOG<sub>33-55</sub>/CFA beginning at disease onset (as in Figure 4). Recipients were treated daily with DMSO or 0.3 mg/kg HF ( $n = 4$  per group). Data are presented as mean EAE clinical score. Arrows indicate start of treatment.
